# Supplementary material
Source: MDPI journal article supplement (https://www.mdpi.com/1996-1073/16/21/7436)
Supplement: s1 [file s1 › energies-2632589-SI.pdf]

# Supplementary material

## Electrification of biorefinery concepts for improved productivity – yield, economic and GHG performances

Sennai Mesfun\*, Gabriel Gustafsson, Anton Larsson, Mahrokh Samavati, Erik Furujsjö

# 1 PROCESS MODELLING

A brief description of the process modelling including main assumptions, modelling approach and simplified process block diagrams are presented here.

## 1.1 ELECTROLYSIS

Electrolysis is not a separate production track, but it is described here as part of supplementary material since the technology is used as an electrification option in many of the production tracks. Two different electrolysis technology, proton exchange membrane (PEMEC) and high-temperature solid oxide (SOEC) are considered for integration to the production process.

Figure S 1 illustrates the simplified system schematic of both electrolyzer systems. All systems presented in this report use the same system configuration, while the size of the electrolysis is set to match the given hydrogen requirement. The required heat for increasing the water feed temperature to operating temperature is provided firstly from internal heat integration in the electrolysis system, or with the biofuel production plant where possible. Electricity is used for the final high-temperature heating for SOEC. Internal heat integration is indeed more vital for SOEC as this system operates at higher temperatures.

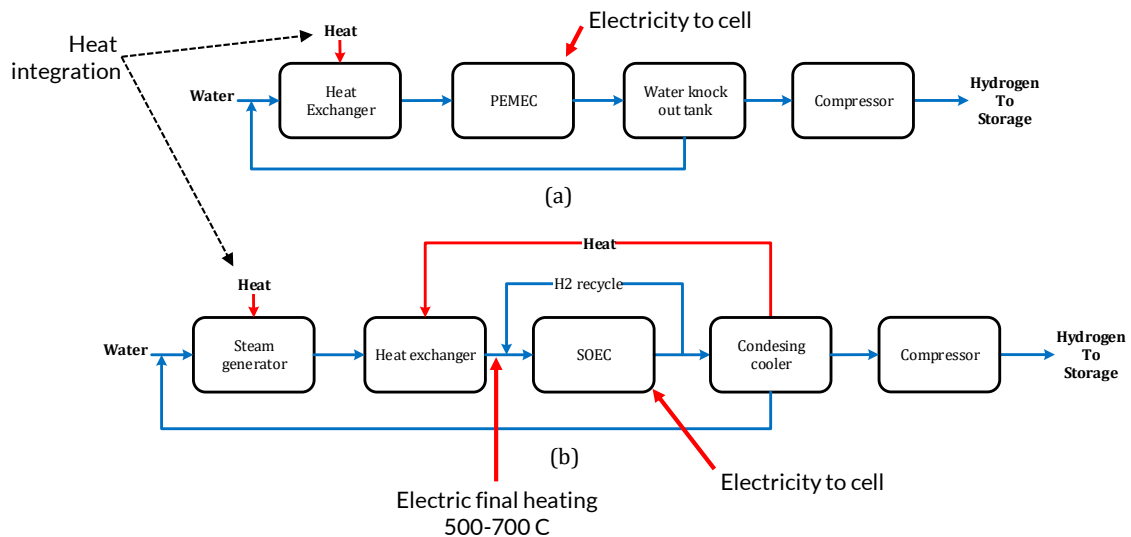

Figure S 1. Simplified system schematic of a) PEMEC and b) SOEC

Electrolyzer systems are modeled using Aspen Plus, and values of key operating parameters are summarized in Table S 1. Built in blocks from the Aspen Plus library was used to model heat exchangers as well as compressors. However, there is no readily available block to represent electrolyzer unit itself. In this case, a stoichiometric reactor linked to user defined calculator blocks was used to introduce the electrochemical reactions as well as electrical power requirement and other operational parameters such as voltage. The table below shows the input parameters used in the model development and few of key results based on kg H<sub>2</sub> that is produced by each system.

Table S 1. Electrolysis system assumptions and values for key parameters

| Parameter                      | Unit                 | Value    |           |
|--------------------------------|----------------------|----------|-----------|
|                                |                      | SOEC [1] | PEMEC [2] |
| Temperature                    | C                    | 700      | 70        |
| Pressure                       | bar                  | 1        | 1         |
| Voltage                        | V                    | 1.6      | 2         |
| Utilization Factor             | ---                  | 0.7      | 0.7       |
| Sweep Air*                     | ---                  | None     | None      |
| Hydrogen Recirculation         | %                    | 14       | None      |
| Water Consumption              | kg/kg <sub>H2</sub>  | 8.97     | 8.97      |
| Oxygen Production              | kg/kg <sub>H2</sub>  | 7.94     | 7.94      |
| Electrolysis Electrical Demand | GWh/kg <sub>H2</sub> | 43       | 53        |
| Hydrogen Compression 40 bar    | GWh/kg <sub>H2</sub> | 2.9      | 2.4       |
| Heat Input                     | GWh/kg <sub>H2</sub> | 9        | 0.5       |
| Electrical Efficiency          | %                    | 77.4     | 62.7      |
| System Efficiency              | %                    | 60.4     | 59.3      |

\* Anode side in case of no immediate use of produced oxygen

## 1.2 MECHANICAL VAPOR RECOMPRESSION (MVR)

Mechanical Vapor Recompression (MVR) heat pump technology is considered for steam generation in conversion pathways with low- to medium-pressure steam deficit. MVR heat pump makes use of the latent heat in low temperature vapor streams in a process by elevating the temperature/pressure of this steam to cover demands at higher temperatures. This will drastically change the amount of electricity needed to produce steam compared to electric steam generation that does not take advantage of the waste heat available in the system since no energy needs to be supplied to change the phase of the stream. When water vapor is compressed to a higher pressure the output steam will be superheated, mainly due to the isentropic efficiency. This in practice implies that the MVR will produce additional steam since injection of water in the superheated steam is done to decrease the temperature to near-saturation.

Typical use of MVR heat pumps in industry is in thermal separation processes, e.g. distillation, evaporation and drying [3]. A block flow diagram of a simplified MVR heat pump is shown in Figure S 2. Table S 2 summarizes processes that involve MVR under electrified options including the COP and % steam avoided due to heat pump.

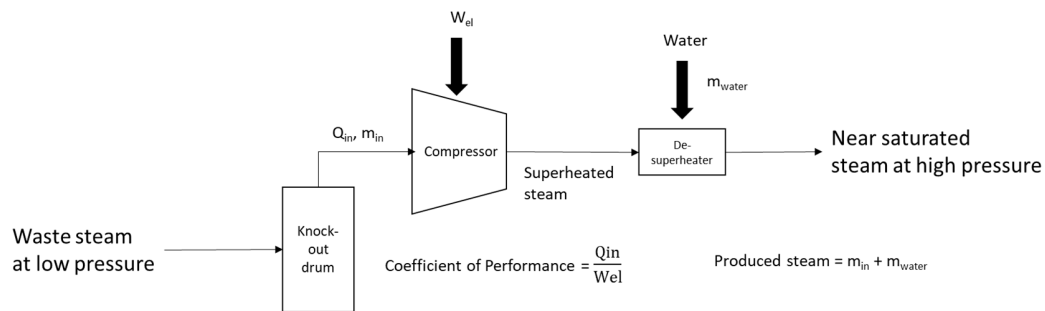

Figure S 2. Block flow diagram of a simplified MVR heat pump

Table S 2. Coefficient of performance (COP) assumptions for MVR heat pumps

| Process              | % steam reduction with MVR heat pump | COP |
|----------------------|--------------------------------------|-----|
| EtOH track           |                                      |     |
| Pretreatment         | 100                                  | 3   |
| Distillation         | 100                                  | 3.5 |
| Wood-pellet drying   | 50                                   | 3   |
| E-fuels              |                                      |     |
| Carbon capture (MEA) | 100                                  | 3   |

### 1.3 LIQUEFACTION TRACKS

#### 1.3.1 LIGNOCELLULOSIC ETHANOL (ETOH)

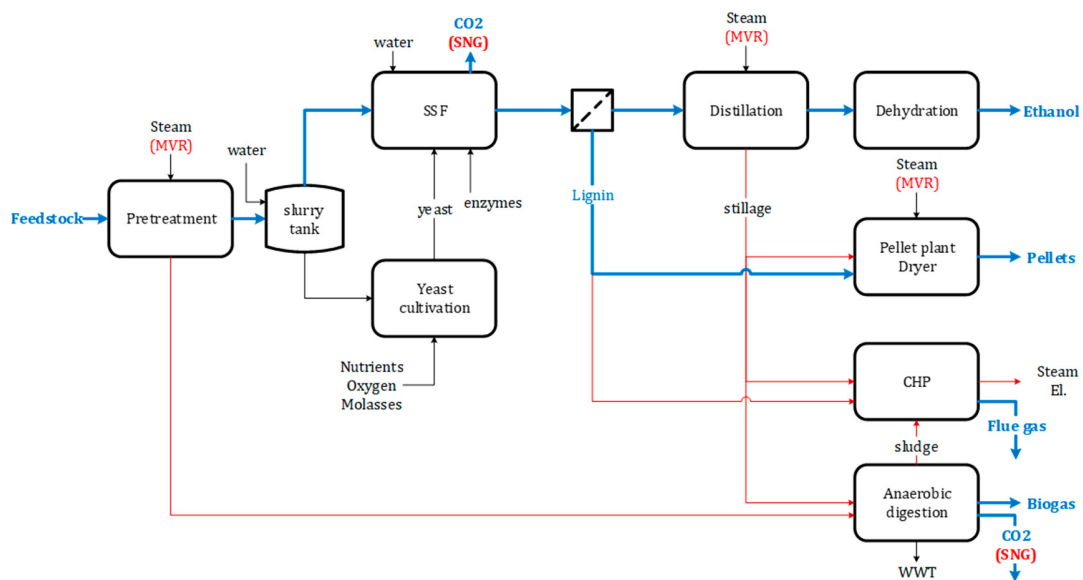

Figure S 3. Schematics of lignocellulosic ethanol (electrification options indicated in brackets)

Table S 3. Lignocellulosic ethanol modelling methodology including electrified options

|                                                 |                                                                                                                                                                                                                         |
|-------------------------------------------------|-------------------------------------------------------------------------------------------------------------------------------------------------------------------------------------------------------------------------|
| Pretreatment                                    | Pressurized mixing to 4 bar, 95°C and to 20 bar, 205°C successively. Yield reactor to decompose feedstock to fermentable sugars and water insoluble solids (WIS)                                                        |
| Depressurizing pretreated feedstock             | Flash tanks at 4 bar and 1 bar                                                                                                                                                                                          |
| Fermentation                                    | Conversion reactor at 35°C                                                                                                                                                                                              |
| Ethanol upgrading                               | Beer column at 3 bar, 15 stages, 93% vol. ethanol, reboiler run on external heat. Rectifier column – shortcut column, reboiler run on energy recovered from beer column condenser. Molecular sieve – component splitter |
| Anaerobic digestion (AD)                        | Conversion reactor                                                                                                                                                                                                      |
| Biogas upgrading                                | Amine wash – component splitter                                                                                                                                                                                         |
| CO <sub>2</sub> compressor (electrified option) | Two stage compressors with intercooler to 40°C, polytropic efficiency 79%                                                                                                                                               |
| Reverse water gas shift (electrified option)    | Equilibrium reactor, 750°C, 30 bar                                                                                                                                                                                      |
| SNG synthesis (electrified option)              | Three-stage equilibrium reactors in series with interstage cooling that produce HP and LP steam and a final condensing cooler to 40°C                                                                                   |

### 1.3.2 HYDROTHERMAL LIQUEFACTION (HTL)

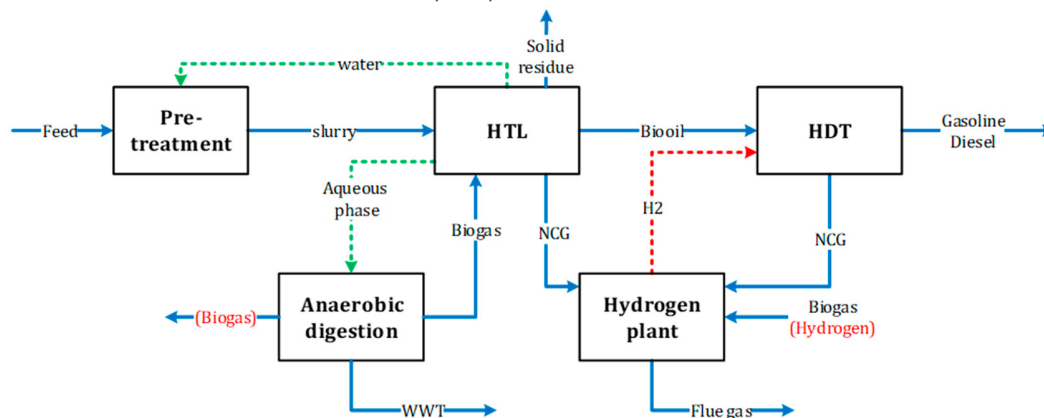

Figure S 4. Schematics of HTL of forest residue to biofuels (electrification options indicated in brackets)

Table S 4. HTL of forest residue modelling methodology

|                          |                                                                                                                                                                                               |
|--------------------------|-----------------------------------------------------------------------------------------------------------------------------------------------------------------------------------------------|
| Slurry prep              | Mixing tank, atmospheric                                                                                                                                                                      |
| Slurry pump              | Rotary pump exit pressure 208 bar, 300°C                                                                                                                                                      |
| HTL                      | Yield reactor at 207 bar, 300°C, fed preheated slurry at 300°C using heat recovered from HTL product effluents                                                                                |
| H <sub>2</sub> plant     | Steam reformer, exit temp. 950°C, 30 bar, modelled as eq. reactor<br>Additional steam injection at 400°C, to favor equilibrium towards H <sub>2</sub><br>PSA – modelled as component splitter |
| HDT                      | Yield reactor, H <sub>2</sub> demand 0.05kg/kg biocrude                                                                                                                                       |
| Upgrading                | Distillation based on boiling point, gasoline <155°C, diesel <365°C and heavies >365°C                                                                                                        |
| Anaerobic digestion (AD) | Conversion reactor                                                                                                                                                                            |
| Biogas upgrading         | Amine wash – component splitter                                                                                                                                                               |
| Biogas combustor         | Gibb's reactor, with spec. control on flue gas O <sub>2</sub> concentration                                                                                                                   |

### 1.3.3 FAST PYROLYSIS (FP)

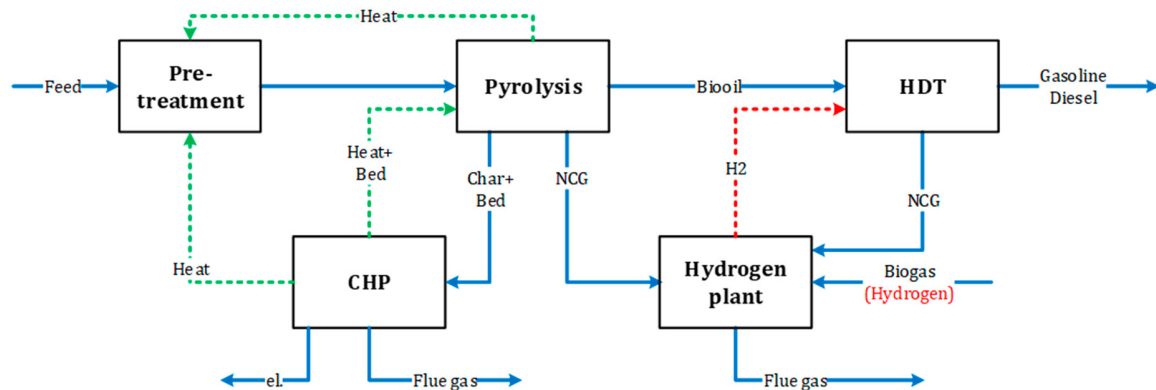

Figure S 5. Schematics of fast pyrolysis of forest residue to biofuels (electrification option indicated in bracket)

Table S 5. Fast pyrolysis and upgrading modelling approach

|                      |                                                                                                                                                                                                     |
|----------------------|-----------------------------------------------------------------------------------------------------------------------------------------------------------------------------------------------------|
| Pretreatment         | Conveyor dryer, to 8% moisture content                                                                                                                                                              |
| Fast pyrolysis       | Yield reactor, 520°C, 1.013 barg                                                                                                                                                                    |
| Separation           | Cyclone, separate char & bed material                                                                                                                                                               |
| Quench tower         | Flash tank at 75°C cooled with recycled pyrolysis oil                                                                                                                                               |
| H <sub>2</sub> plant | Steam reformer, exit temp. 950°C, 30 bar, modelled as eq. reactor<br>Additional steam injection at 400°C to favor equilibrium towards H <sub>2</sub><br>PSA – component splitter                    |
| HDT                  | Yield reactor, H <sub>2</sub> demand 0.05kg/kg biocrude                                                                                                                                             |
| Upgrading            | Distillation based on boiling point, gasoline <155°C, diesel <365°C<br>and heavies >365°C                                                                                                           |
| CHP                  | Char combustor modelled as conversion reactor with spec. control on<br>flue gas O <sub>2</sub> concentration. Preheated sand to pyrolysis reactor. Steam<br>Rankine cycle, HPS at 540°C and 120 bar |

#### 1.4 BLACK LIQUOR GASIFICATION (BLG)

The mass and energy balances of BLG tracks are derived based on processes modelled in UniSim Design®.

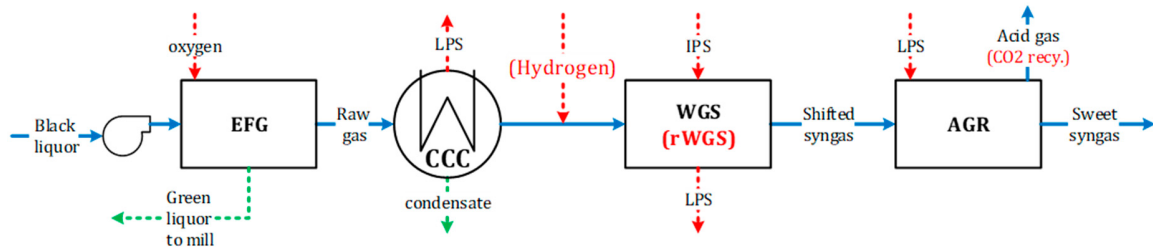

Figure S 6. Schematics of BLG up to sweet syngas (electrification options indicated in brackets)

Table S 6. BLG modeling methodology up to sweet syngas

|                                 |                                                                                                                                                      |
|---------------------------------|------------------------------------------------------------------------------------------------------------------------------------------------------|
| BL pump                         | Centrifugal pump with outlet pressure 31 barg.<br>Adiabatic efficiency: 75%                                                                          |
| BLG (EFG)                       | Equilibrium reactor, 1050°C, 31 barg. Empirical correlation for components with poor equilibrium prediction, e.g., H <sub>2</sub> S, CH <sub>4</sub> |
| Counter current condenser (CCC) | Multiple heat exchangers. Flash at 80°C and 40°C                                                                                                     |
| WGS reactor                     | Saturator 190-200°C. Equilibrium reactor ~400°C                                                                                                      |
| AGR (amine wash)                | Component splitter. Steam demand for reboiler duty calculated externally                                                                             |

#### 1.4.1 BLG FOR METHANOL PRODUCTION

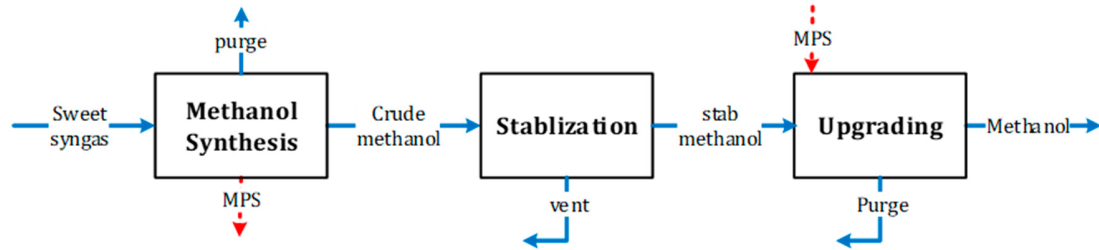

Figure S 7. Schematics of methanol synthesis from sweet syngas

Table S 7. Methanol synthesis modelling

|                              |                                                                                                      |
|------------------------------|------------------------------------------------------------------------------------------------------|
| Gas compressor               | Centrifugal compressor with aftercooler to 125°C, outlet pressure 80 barg, polytropic efficiency 79% |
| Methanol Synthesis (MSY)     | Equilibrium reactor, 233°C, 80 barg                                                                  |
| Methanol stabilization (MST) | Multiple stage column                                                                                |
| Methanol purification (MPU)  | Distillation column, product spec 99.99 vol. % methanol                                              |

#### 1.4.2 BLG FOR FT PRODUCTION

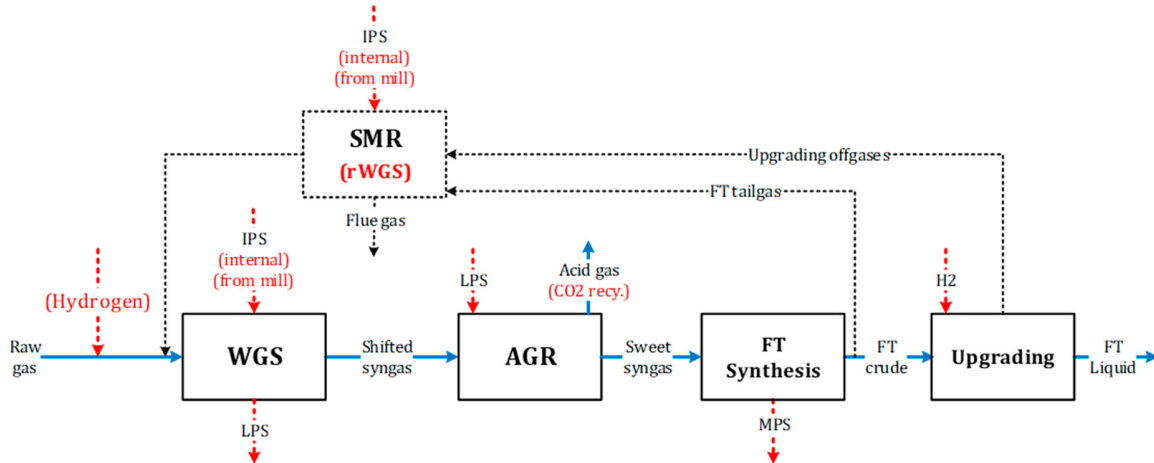

Figure S 8. Schematics of BLG for FT fuels – gas conditioning (electrification options indicated in bracket), synthesis and upgrading

Table S 8. FT fuels synthesis and upgrading modelling

|                        |                                                                                                                                                                                                  |
|------------------------|--------------------------------------------------------------------------------------------------------------------------------------------------------------------------------------------------|
| FT tail gas compressor | Centrifugal compressor, outlet pressure 21 barg<br>polytropic efficiency 79%                                                                                                                     |
| FT Synthesis (FTS)     | Synthesis – yield reactor, maintained at 240°C, 80% internal recycle<br>Water cooled reactor, produce 12barg saturated steam<br>Separation – 3-phase decanter at 40°C to FTL, FT water and gases |
| Upgrading              | Upgrading was not explicitly modelled but H <sub>2</sub> demand for upgrading is internally produced<br>PSA modelled as component splitter                                                       |
| Steam reformer         | Equilibrium reactor, exit temperature 950°C<br>C <sub>1</sub> to C <sub>4</sub> assumed to be reformed                                                                                           |

## 1.5 DUAL FLUIDIZED BED GASIFICATION (DFB)

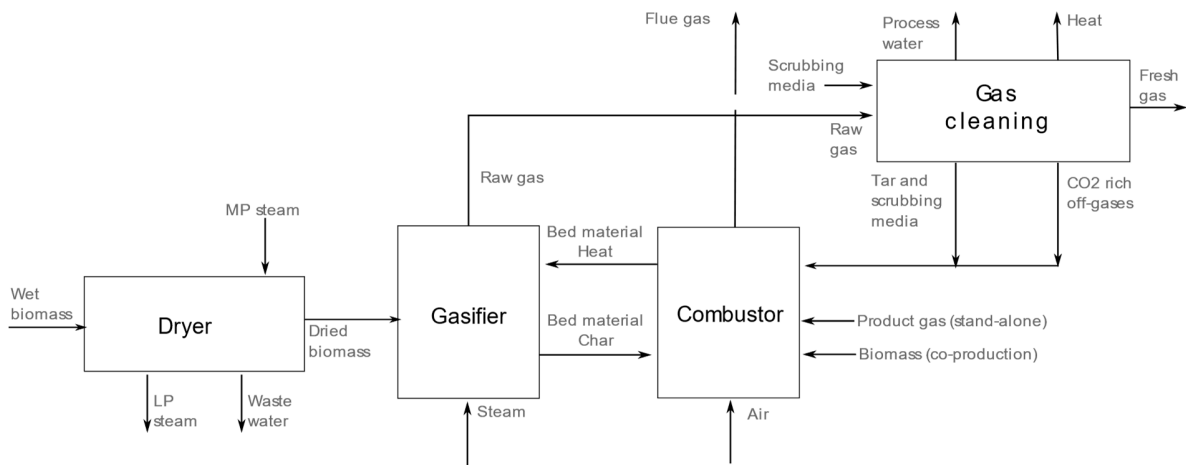

Figure S 9. Schematics of a DFB gasification system including the primary gas cleaning

## 1.6 DIRECT OXYGEN-BLOWN FLUIDIZED BED GASIFICATION (O2FB)

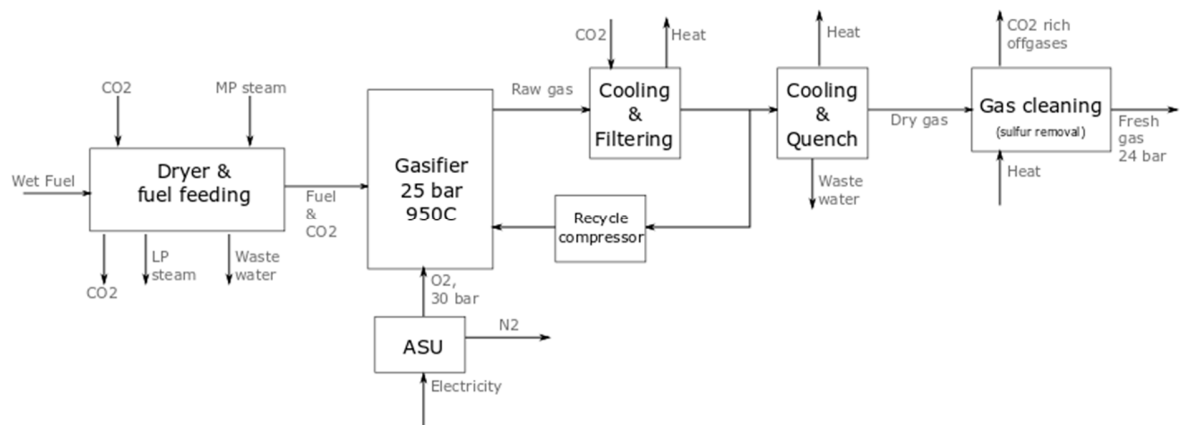

Figure S 10. Schematics of an O2FB gasifier with primary gas cleaning.

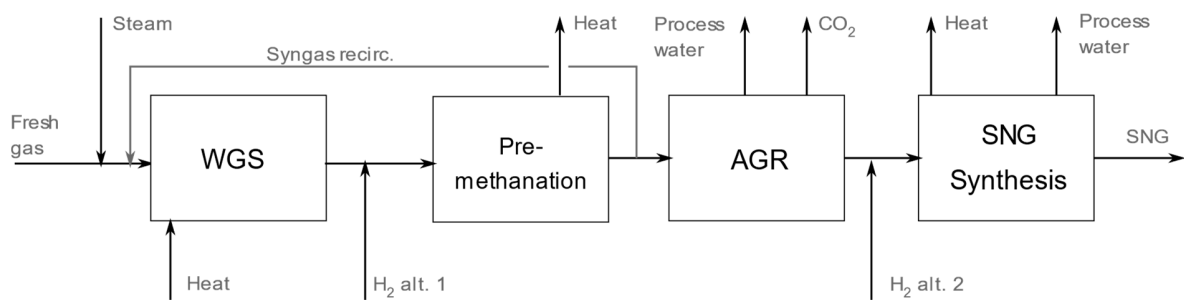

Figure S 11. Simplified process for SNG production including indications for H<sub>2</sub> addition under electrified options

Table S 9. The main assumptions used when modelling the Bio-SNG process

|                                                                     |                                                                                                                                                                                                                                                                                                                                                                                                                                                    |
|---------------------------------------------------------------------|----------------------------------------------------------------------------------------------------------------------------------------------------------------------------------------------------------------------------------------------------------------------------------------------------------------------------------------------------------------------------------------------------------------------------------------------------|
| Main compressor (only DFB)                                          | Outlet pressure 30 bar, 3 stage compressor. Interstage cooling down to 55 °C. Assumed isentropic efficiency: 78%                                                                                                                                                                                                                                                                                                                                   |
| Gas cleaning (only DFB)                                             | <p>Tar removed by scrubbing with RME, tar enriched RME sent to CHP furnace for destruction.</p> <p>MDEA Reboiler duty : 2.24 MW/kg Acid Gas [4].</p> <p>Fraction of CO<sub>2</sub> in stream co-absorbed when removing H<sub>2</sub>S: 0.1</p> <p>Assumed “complete” removal of H<sub>2</sub>S in gas, probably with help of guard beds.</p> <p>BTX separated out using activated carbon and sent to furnace. Heat losses currently neglected.</p> |
| WGS reactor - Low temperature catalyst                              | Gibbs minimization reactor. Inlet temp: 200 C.                                                                                                                                                                                                                                                                                                                                                                                                     |
| Pre-methanator                                                      | Irreversible decomposition of higher hydrocarbons to syngas followed by equilibrium reactors. Inlet temp: given by WGS reactor and olefin content. Max allowed outlet temp 700 °C, regulated by recirculation if necessary. Subsequent cooling by raising HP steam                                                                                                                                                                                 |
| CO <sub>2</sub> removal –<br>Activated MDEA Amine scrubber          | Reboiler duty : 0.83 MW/kg Acid Gas [4].                                                                                                                                                                                                                                                                                                                                                                                                           |
| SNG synthesis - 4 staged adiabatic reactors with interstage cooling | <p>Equilibrium reactors. Inlet temp 250 °C.</p> <p>The 2 last reactors are polishing steps, i.e. water is condensed out before to push the equilibrium to the necessary CH<sub>4</sub> concentration for pipeline specifications.</p> <p>Interstage cooling by HP steam raising in the first 2 reactors. LP and district heating in the polishing steps.</p>                                                                                       |

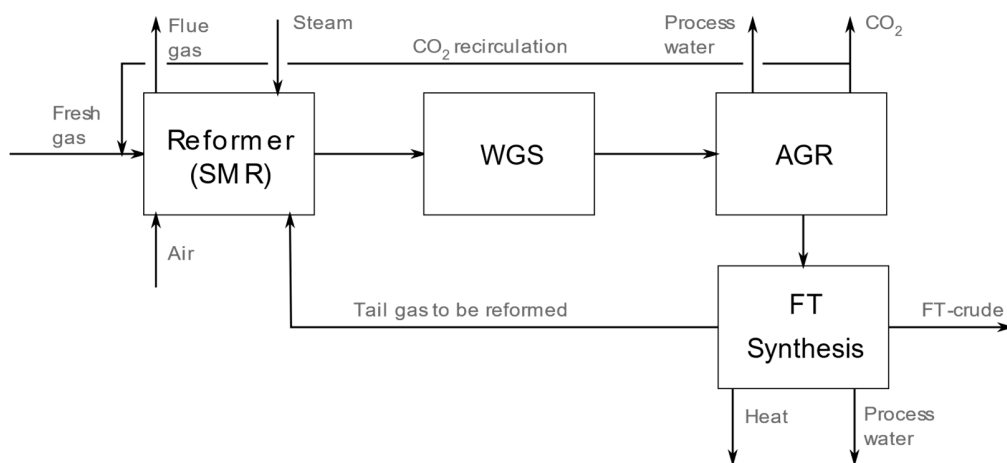

Figure S 12. Simplified process for FT production

Table S 10. The main assumptions used in the FT modelling work

|                            |                                                                                                                                                                                                                                                                                                                                                                                                                                                    |
|----------------------------|----------------------------------------------------------------------------------------------------------------------------------------------------------------------------------------------------------------------------------------------------------------------------------------------------------------------------------------------------------------------------------------------------------------------------------------------------|
| Main compressor (only DFB) | Outlet pressure 30 bar, 3 stage compressor. Interstage cooling down to 55 C. Assumed isentropic efficiency: 78%                                                                                                                                                                                                                                                                                                                                    |
| Gas cleaning (only DFB)    | <p>Tar removed by scrubbing with RME, tar enriched RME sent to CHP furnace for destruction.</p> <p>MDEA Reboiler duty : 2.24 MW/kg Acid Gas [4].</p> <p>Fraction of CO<sub>2</sub> in stream co-absorbed when removing H<sub>2</sub>S: 0.1</p> <p>Assumed “complete” removal of H<sub>2</sub>S in gas, probably with help of guard beds.</p> <p>BTX separated out using activated carbon and sent to furnace. Heat losses currently neglected.</p> |
| Pre-reformer               | <p>Adiabatic. Irreversible decomposition of higher hydrocarbons to syngas followed by Gibbs minimization.</p> <p>Inlet temp: 380 °C. Max allowed outlet temp 650 °C, regulated by CO<sub>2</sub> recirculation as thermal ballast.</p> <p>Steam ratio chosen as to give 1.8 mol H<sub>2</sub>O/mol C in hydrocarbons entering the reformer</p>                                                                                                     |
| Reformer                   | <p>Assumed to be heated tubes with outlet at equilibrium, T<sub>out</sub> = 950°C</p> <p>Reformer heating = reaction enthalpy + heating from 800 °C to 950 °C. Uses part of fresh gas as fuel if fired, electricity in case of eSMR.</p> <p>Hydrogen added before reformer gives rise to reverse WGS and thus increased CO<sub>2</sub> utilization.</p> <p>Effluent cooled by Feed-Effluent exchange and HP steam raising</p>                      |
| WGS                        | Adiabatic Gibbs minimization. Inlet temp 300 °C. High temperature catalyst                                                                                                                                                                                                                                                                                                                                                                         |
| CO <sub>2</sub> removal    | Activated MDEA Amine scrubber. Reboiler duty : 0.83 MW/kg Acid Gas [4]. Recirculated CO <sub>2</sub> recompressed from 9 to 29 bar.                                                                                                                                                                                                                                                                                                                |
| FT synthesis               | <p>“Low temperature” operation at 220 °C. Alpha value at 0.9, thought to correspond to a Co-based catalyst. Production of oxygenates assumed negligible. Internal recirculation ratio of 0.7</p> <p>Partial phase separation of waxes in the reactor vessel. – flash calculation.</p> <p>Reactor cooled to maintain 220 °C by boiling water on the shell side.</p>                                                                                 |

|                          |                                                                                                                                                                                                                      |
|--------------------------|----------------------------------------------------------------------------------------------------------------------------------------------------------------------------------------------------------------------|
| Phase separation         | 3 phase flash operating at 50 °C. Stabilizer column separating out C5 and lighter, to ensure the crude holds a vapor pressure suitable for transport. Stabilizer column not rigorously calculated, just a sharp cut. |
| Bleed flow               | Set to 1% of the tail gas stream, to avoid N2 accumulation.                                                                                                                                                          |
| Recirculation compressor | Recompressing the FT tail gas from 22 to 28 bar to allow recirculating it back to the reformer. Assumed Isentropic efficiency: 78 %                                                                                  |

## 2 REFERENCE E-FUELS TRACKS

Electrofuel tracks, pathways that convert electricity and CO<sub>2</sub> into fuels, are evaluated for comparison to the bio-electrofuel concepts. A total of 3 electrofuel tracks aiming at production of FT fuels, methanol, and synthetic natural gas (SNG) are considered. In the first step, syngas suitable for the synthesis of advanced biofuel is produced from electrolysis-based hydrogen (PEM) and biogenic CO<sub>2</sub> in a reverse water-gas-shift (rWGS) process operated at 750°C and 30 bar. The equilibrium of the rWGS is controlled to favor syngas composition that satisfy conditions for optimal synthesis of desired biofuel downstream.

The CO<sub>2</sub> feed is assumed to be captured from biogenic sources such as biomass-based CHP plants, pulp and paper mill, biogas, bioethanol plants. Amine process, as one of the most mature techniques for carbon capture from flue gas or other CO<sub>2</sub> containing streams, is considered for CO<sub>2</sub> capture<sup>5</sup>. The amine scrubbing technique involves a stripping column to regenerate solvent in which the CO<sub>2</sub>-rich solution flows downwards against a counter-current flow of vapor generated in the reboiler [5]. The energy demand of the reboiler makes amine scrubbing technique energy intensive. A typical MEA-based system in industrial configuration is expected to have energy consumption 3.2–4.2 MJ per kg-CO<sub>2</sub> separated, depending on the CO<sub>2</sub> concentration in feed, CO<sub>2</sub> removal rate (85%–90%), and system operating conditions [6]. Energy consumption 1MWh/tCO<sub>2</sub> (90% in form of heat and 10% in form of electricity to drive the system, excluding compression electricity) is used for the cases evaluated in this work. The heat demand of the reboiler can be satisfied by LPS (3-5 bar or 133°C -150°C) with a return temperature well above 100°C [6].

The production capacities of the electrofuel cases are selected to match available biogenic CO<sub>2</sub> sources in Sweden at scales 300 kt/y or higher [7]. 300 kt/y CO<sub>2</sub> correspond to biofuel production capacities for FT fuels (144 MW HHV), methanol (144 MW HHV) and SNG (201 MW HHV) assuming 90% annual plant availability. The mass and energy balances of the electrofuel tracks are taken from Brynolf et al. [8] for 2030 base case scenario, Table S 11.

Useful excess heat generated during synthesis is utilized to supply part of the energy demand of the amine process. Any heat deficit for the CO<sub>2</sub> removal process is assumed to be supplied from an integrated MVR heat pump that run with a COP 3. The MVR lifts temperature of water vapor generated by flashing reboiler condensate and by utilizing heat recovered from low-temperature streams available onsite, 85°C – 100°C.

Table S 11 E-fuels – relevant inputs and outputs

| E-fuel tracks   | Unit               | eFT  | eMeOH | eSNG |
|-----------------|--------------------|------|-------|------|
| Input           |                    |      |       |      |
| H <sub>2</sub>  | MWh <sub>LHV</sub> | 1.37 | 1.25  | 1.30 |
| CO <sub>2</sub> | tonne              | 0.28 | 0.32  | 0.21 |
| Output          |                    |      |       |      |
| Fuel            | MWh <sub>LHV</sub> | 1.00 | 1.00  | 1.00 |

|      |                   |      |      |      |
|------|-------------------|------|------|------|
| Heat | MWh <sub>th</sub> | 0.20 | 0.10 | 0.20 |
|------|-------------------|------|------|------|

### 3 EQUIPMENT COST OF MAJOR PROCESS UNITS

Table S 12. Equipment cost of major process units used to derive CAPEX

| Process section                        | Scaling parameter                  | Scaling exp. | Base size (S <sub>o</sub> ) | Base cost (C <sub>o</sub> ) M€ <sup>a</sup> | Base year | Reference  |
|----------------------------------------|------------------------------------|--------------|-----------------------------|---------------------------------------------|-----------|------------|
| Feedstock handling and feeding system  |                                    |              |                             |                                             |           |            |
| Gasification feed handling system      | production, MW <sub>th</sub>       | 0.65         | 100                         | 31                                          | 2014      | [9]        |
| Belt dryer                             | production, MW <sub>th</sub>       | 0.65         | 100                         | 7                                           | 2014      | [9]        |
| Gasification feeding system            | production, MW <sub>th</sub>       | 0.60         | 20                          | 6                                           | 2014      | [9]        |
| Air separation unit (ASU)              | oxygen, ton/day                    | 0.65         | 442                         | 27                                          | 2017      | Commercial |
| Liquefaction feed handling & prep      | feedstock, ton <sub>wet</sub> /h   | 0.77         | 65                          | 10                                          | 2014      | [10]       |
| Main conversion units                  |                                    |              |                             |                                             |           |            |
| Entrained flow gasifier (black liquor) | BL, tBLS/day                       | 0.70         | 500                         | 24                                          | 2017      | Commercial |
| Dual fluidized bed gasifier            | biomass feed, MW <sub>th</sub>     | 0.60         | 100                         | 60                                          | 2020      | BioShare   |
| Fluidized bed gasifier                 | biomass feed, MW <sub>th</sub>     | 0.60         | 170                         | 70                                          | 2020      | BioShare   |
| Hydrothermal liquefaction reactor      | feed, ton <sub>DM</sub> /day       | 0.70         | 500                         | 114                                         | 2014      | [10]       |
| Fast pyrolysis reactor                 | feed, ton <sub>DM</sub> /h         | 0.40         | 10                          | 12                                          | 2000      | [10]       |
| Hydrogen plant                         | production, ton <sub>H2</sub> /day | 0.70         | 16                          | 31                                          | 2014      | [10]       |
| Intermediate product refining units    |                                    |              |                             |                                             |           |            |
| Compressor                             | feed, kmol/h                       | 0.70         | 285                         | 4                                           | 2014 b    | [9]        |
| Conventional steam reforming (SMR)     | feed, kmol/h                       | 0.60         | 31 733                      | 74                                          | 2014      | [11]       |
| Electrified steam reforming (eSMR)     | feed, kmol/h                       | 0.60         | 31 733                      | 37                                          | 2014 c    |            |
| Water gas shift (WGS)                  | raw syngas, Nm <sup>3</sup> /h     | 0.65         | 59 000                      | 6                                           | 2009      | Commercial |
| Acid gas removal (amine wash)          | shifted syngas, Nm <sup>3</sup> /h | 0.65         | 15 695                      | 2.5                                         | 2018      | Commercial |

|                                      |                                  |      |        |      |      |              |            |
|--------------------------------------|----------------------------------|------|--------|------|------|--------------|------------|
| Zinc bed                             | HHV biomass, MW <sub>th</sub>    | 0.65 | 216    | 2.3  | 2012 |              | [12]       |
| H <sub>2</sub> S scrubber            | feed, kmol/h                     | 0.70 | 285    | 1    | 2014 | <sup>b</sup> | [9]        |
| PEM electrolyser                     | electricity input, MW            | 1    | 1      | 0.8  | 2016 | <sup>d</sup> | [13]       |
| SOEC electrolyser                    | Electricity input, MW            | 1    | 1      | 1.2  | 2018 |              | [8]        |
| SMR/rWGS                             | feed, kmol/h                     | 0.60 | 31 733 | 74   | 2014 | <sup>e</sup> | [11]       |
| Carbon capture (amine technology)    | separated CO <sub>2</sub> , kton | 1    | 1      | 0.05 | 2015 |              | [8]        |
| Mechanical vapor recompression (MVR) | heat delivered, MW <sub>th</sub> | 1    | 1      | 0.5  | 2018 |              | [14]       |
| Biofuel synthesis                    |                                  |      |        |      |      |              |            |
| Fischer Tropsch synthesis reactor    | syngas feed, Nm <sup>3</sup> /h  | 0.75 | 70 630 | 56   | 2007 | <sup>f</sup> | [15]       |
| Methanol Synthesis reactor           | MeOH, ton/day                    | 0.65 | 465    | 26   | 2017 |              | Commercial |
| Synthetic natural gas reactors       | syngas feed, kmol/h              | 0.70 | 285    | 5.2  | 2014 | <sup>b</sup> | [9]        |
| Final product refining and upgrading |                                  |      |        |      |      |              |            |
| HTL oil upgrading                    | HTL oil flow, ton/day            | 0.70 | 184    | 16   | 2014 |              | [10]       |
| Pyrolysis oil upgrading              | Pyro oil flow, ton/day           | 0.70 | 360    | 57   | 2014 |              | [10]       |
| Fischer Tropsch upgrading            | FT crude, ton/day                | 0.65 | 6      | 15   | 2007 |              | [15]       |
| Methanol upgrading                   | MeOH, ton/day                    | 0.65 | 465    | 17   | 2017 |              | Commercial |

<sup>a</sup>Base cost other than Euro converted to Euro equivalent using average annual exchange rate of the reference year.

<sup>b</sup>Original cost reported for 20 MW biofuel product plant capacity. The scaling parameter was converted to molar flow.

<sup>c</sup>Assumed to be half of that of SMR due to the significant size reduction expected with the design of eSMR configuration [16]. Besides, no side-fired combustor is needed for eSMR configuration which further reduces the capital cost compared to traditional SMR.

<sup>d</sup>PEM electrolyser cost refers to projected cost for 2030, in line with the timeline this study considers.

<sup>e</sup>Following discussions with experts in the subject, it is possible to run a steam reformer in reverse water-gas-shift (rWGS) mode by fine tuning the operating parameters (temperature, pressure, steam, catalyst) to favour desired products. The cost of rWGS is thus assumed to be the same as that of steam-methane reformer.

<sup>f</sup>FT synthesis cost recalculated to reflect the configuration used in this study. The source reported aggregated cost for FT synthesis, ATR, FT refining and recycle compressor. Cost for reformer and recycle compressor are deducted.

## 4 CARBON AND ENERGY BALANCES

Carbon and energy balances of all pathways grouped by technology track are presented here. Energy values refer to higher heating values (HHV).

### 4.1 LIGNOCELLULOSIC ETHANOL (ETOH)

Table S 13. EtOH carbon and energy balances

| Scenario      | EtOH_ref       |              | EtOH_1         |              | EtOH_2         |                      | EtOH_3         |                     |
|---------------|----------------|--------------|----------------|--------------|----------------|----------------------|----------------|---------------------|
|               | Carbon<br>kg/h | Energy<br>MW | Carbon<br>kg/h | Energy<br>MW | Carbon<br>kg/h | Energy<br>MW<br>SOEC | Carbon<br>kg/h | Energy<br>MW<br>PEM |
| <b>Input</b>  |                |              |                |              |                |                      |                |                     |
| Feedstock     | 13 402         | 137          | 13 402         | 137          | 13 402         | 137                  | 13 402         | 137                 |
| Electricity   |                | 0            |                | 9            |                | 84                   |                | 92                  |
| <b>Output</b> |                |              |                |              |                |                      |                |                     |
| Ethanol       | 3 028          | 48           | 3 028          | 48           | 3 028          | 48                   | 3 028          | 48                  |
| Biogas        | 658            | 14           | 658            | 14           | 2 987          | 61                   | 2 987          | 61                  |
| Pellets       | 3 873          | 42           | 6 208          | 68           | 6 206          | 68                   | 6 206          | 68                  |
| Electricity   |                | 2            |                | 0            |                | 0                    |                | 0                   |
| <b>Other</b>  |                |              |                |              |                |                      |                |                     |
| Ferm. CO2     | 1 669          |              | 1 669          |              |                |                      |                |                     |
| AD CO2        | 720            |              | 720            |              |                |                      |                |                     |
| Flue gas      | 3 293          |              | 968            |              | 968            |                      | 968            |                     |
| District heat |                | 4            |                | 4            |                | 5                    |                | 5                   |
| Cold utility  |                | 28           |                | 12           |                | 39                   |                | 47                  |
| Wastewater    | 160            |              | 151            |              | 213            |                      | 213            |                     |

## 4.2 ALCOHOL TO JET (ATJ)

Table S 14. ATJ carbon and energy balances

| Scenario                     | ATJ_ref        |              | ATJ_2          |                      | ATJ_3          |                     |
|------------------------------|----------------|--------------|----------------|----------------------|----------------|---------------------|
|                              | Carbon<br>kg/h | Energy<br>MW | Carbon<br>kg/h | Energy<br>MW<br>SOEC | Carbon<br>kg/h | Energy<br>MW<br>PEM |
| Input (background process)   |                |              |                |                      |                |                     |
| Feedstock                    | 31 639         | 324          | 31 636         | 324                  | 31 636         | 324                 |
| Electricity                  |                | 0            |                | 197                  |                | 216                 |
| Output (background process)  |                |              |                |                      |                |                     |
| Ethanol                      | 7 136          | 113          | 7 136          | 113                  | 7 136          | 113                 |
| Biogas/SNG export            | 1 552          | 32           | 7 050          | 145                  | 7 050          | 145                 |
| Pellets                      | 9 151          | 100          | 14 636         | 160                  | 14 636         | 160                 |
| Electricity                  |                | 6            |                | 0                    |                | 0                   |
| Fermentation CO <sub>2</sub> | 3 940          |              |                |                      |                |                     |
| AD CO <sub>2</sub>           | 1 699          |              |                |                      |                |                     |
| Flue gas                     | 7 772          |              | 2 284          |                      | 2 284          |                     |
| District heat                |                | 9            |                | 3                    |                | 3                   |
| Wastewater                   | 378            |              | 519            |                      | 519            |                     |
| Cold utility                 |                | 64           |                | 99                   |                | 119                 |
| Input (ATJ)                  |                |              |                |                      |                |                     |
| Ethanol                      | 7 136          | 113          | 7 136          | 113                  | 7 136          | 113                 |
| Biogas                       | 938            | 17           | 0              | 0                    | 0              | 0                   |
| Electricity                  |                | 1            |                | 18                   |                | 19                  |
| Output (ATJ)                 |                |              |                |                      |                |                     |
| Jet                          | 6 266          | 93           | 6 266          | 93                   | 6 266          | 93                  |
| Diesel                       | 820            | 12           | 820            | 12                   | 820            | 12                  |
| Other (ATJ)                  |                |              |                |                      |                |                     |
| Flue gas                     | 987            |              |                |                      |                |                     |
| District heat                |                | 8            |                | 6                    |                | 6                   |
| Cold utility                 |                | 18           |                | 20                   |                | 21                  |
| Wastewater                   | 49             |              | 49             |                      | 49             |                     |

### 4.3 HYDROTHERMAL LIQUEFACTION (HTL)

Table S 15. HTL carbon and energy balances

| Scenario    | HTL_ref |        | HTL_1  |        | HTL_2  |        | HTL_3  |        | HTL_4  |        |
|-------------|---------|--------|--------|--------|--------|--------|--------|--------|--------|--------|
|             | Carbon  | Energy | Carbon | Energy | Carbon | Energy | Carbon | Energy | Carbon | Energy |
|             | kg/h    | MW     | kg/h   | MW     | kg/h   | MW     | kg/h   | MW     | kg/h   | MW     |
|             |         |        |        | SOEC   |        | PEM    |        | SOEC   |        | PEM    |
| Input       |         |        |        |        |        |        |        |        |        |        |
| Feedstock   | 7 392   | 94     | 7 392  | 94     | 7 392  | 94     | 7 392  | 94     | 7 392  | 94     |
| Biogas      | 1 866   | 38     | 968    | 20     | 968    | 20     |        |        |        |        |
| Electricity |         | 1      |        | 20     |        | 21     |        | 36     |        | 38     |
| Output      |         |        |        |        |        |        |        |        |        |        |
| Gasoline    | 3 229   | 49     | 3 229  | 49     | 3 229  | 49     | 3 229  | 49     | 3 229  | 49     |
| Diesel      | 828     | 11     | 828    | 11     | 828    | 11     | 828    | 11     | 828    | 11     |
| Heavies     | 666     | 8      | 666    | 8      | 666    | 8      | 666    | 8      | 666    | 8      |
| Electricity |         |        |        |        |        |        |        |        |        |        |
| Biogas      |         |        |        |        |        |        | 233    | 5      | 233    | 5      |
| Other       |         |        |        |        |        |        |        |        |        |        |
| Char        | 611     | 6      | 611    | 6      | 611    | 6      | 611    | 6      | 611    | 6      |
| Flue gas    | 2 863   |        | 1 941  |        | 1 941  |        | 740    |        | 740    |        |
| AD CO2      | 233     |        | 233    |        | 233    |        | 233    |        | 233    |        |
| DH          |         | 9      |        | 9      |        | 9      |        | 9      |        | 9      |
| CU &        |         | 49     |        | 50     |        | 52     |        | 42     |        | 44     |
| losses      |         |        |        |        |        |        |        |        |        |        |
| Wastewater  | 829     |        | 852    |        | 852    |        | 852    |        | 852    |        |

#### 4.4 FAST PYROLYSIS (FP)

Table S 16. FP carbon and energy balances

| Scenario      | FP_ref         |              | FP_1           |                      | FP_2           |                     |
|---------------|----------------|--------------|----------------|----------------------|----------------|---------------------|
|               | Carbon<br>kg/h | Energy<br>MW | Carbon<br>kg/h | Energy<br>MW<br>SOEC | Carbon<br>kg/h | Energy<br>MW<br>PEM |
| Input         |                |              |                |                      |                |                     |
| Feedstock     | 2 354          | 27           | 2 354          | 27                   | 2 354          | 27                  |
| Biogas        | 357            | 7            | 0              | 0                    | 0              | 0                   |
| Electricity   |                | 0            |                | 7                    |                | 9                   |
| Output        |                |              |                |                      |                |                     |
| Gasoline      | 623            | 10           | 623            | 10                   | 623            | 10                  |
| Diesel        | 467            | 7            | 467            | 7                    | 467            | 7                   |
| Heavies       | 236            | 3            | 236            | 3                    | 236            | 3                   |
| Electricity   |                | 1.69         |                | 0.00                 |                | 0.00                |
| Other         |                |              |                |                      |                |                     |
| Flue gas      | 1 367          |              | 971            |                      | 971            |                     |
| District heat |                | 1.27         |                | 1.75                 |                | 1.75                |
| CU & losses   | 7              | 13           | 25             | 14                   | 25             | 15                  |
| Wastewater    | 12             |              | 34             |                      | 34             |                     |

#### 4.5 BLACK LIQUOR GASIFICATOIN FOR METHANOL PRODUCTION (BLG-MEOH)

Table S 17. BLG-MeOH carbon and energy balances

| Scenario              | BLG-MeOH_ref |        | BLG-MeOH_1 |        | BLG-MeOH_2 |        | BLG-MeOH_3 |        | BLG-MeOH_4 |        |
|-----------------------|--------------|--------|------------|--------|------------|--------|------------|--------|------------|--------|
|                       | Carbon       | Energy | Carbon     | Energy | Carbon     | Energy | Carbon     | Energy | Carbon     | Energy |
|                       | kg/h         | MW     | kg/h       | MW     | kg/h       | MW     | kg/h       | MW     | kg/h       | MW     |
|                       |              |        |            | SOEC   |            | PEM    |            | SOEC   |            | PEM    |
| Changes to mill BAU   |              |        |            |        |            |        |            |        |            |        |
| Replacement feed      | 25 989       | 291    | 27 064     | 304    | 27 064     | 304    | 30 165     | 338    | 30 165     | 338    |
| Electricity           |              | 16     |            | 173    |            | 192    |            | 481    |            | 533    |
|                       |              |        |            |        |            |        |            |        |            |        |
| Output                |              |        |            |        |            |        |            |        |            |        |
| MeOH                  | 9 542        | 160    | 16 084     | 270    | 16 084     | 270    | 27 172     | 456    | 27 172     | 456    |
| Electricity           |              | 0      |            | 0      |            | 0      |            | 0      |            | 0      |
|                       |              |        |            |        |            |        |            |        |            |        |
| Secondary             |              |        |            |        |            |        |            |        |            |        |
| Steam to mill         |              |        |            |        |            |        |            |        |            |        |
| LPS                   |              | 61     |            | 56     |            | 56     |            | 44     |            | 44     |
| MPS                   |              | -2     |            | -4     |            | -4     |            | -10    |            | -10    |
| IPS                   |              | 0      |            | 0.0    |            | 0.0    |            | 0.0    |            | 0.0    |
| District heat         |              | 4      |            | 6      |            | 6      |            | 14     |            | 14     |
| Green liquor          | 3 214        |        | 3 214      |        | 3 214      |        | 3 214      |        | 3 214      |        |
| Conc. CO2             | 18 018       |        | 12 016     |        | 12 016     |        | 0.02       |        | 0.02       |        |
| off gases             | 1 398        |        | 1 615      |        | 1 615      |        | 2 490      |        | 2 490      |        |
| Cold utility          |              | 71     |            | 110    |            | 114    |            | 188    |            | 200    |
| Wastewater            | 1498         |        | 740        |        | 740        |        | 794        |        | 794        |        |
|                       |              |        |            |        |            |        |            |        |            |        |
| Non energy co-product |              |        |            |        |            |        |            |        |            |        |
| Oxygen, kg/h          |              | 0      |            | 0      |            | 0      |            | 854    |            | 854    |

#### 4.6 BLACK LIQUOR GASIFICATION FOR FISCHER TROPSCH FUEL PRODUCTION (BLG-FT)

Table S 18. BLG-FT carbon and energy balance – SMR configuration

| Scenario                   | BLG-FT_ref     |              | BLG-FT_1       |              | BLG-FT_2       |                      | BLG-FT_3       |                     | BLG-FT_4       |                      | BLG-FT_5       |                     |
|----------------------------|----------------|--------------|----------------|--------------|----------------|----------------------|----------------|---------------------|----------------|----------------------|----------------|---------------------|
|                            | Carbon<br>kg/h | Energy<br>MW | Carbon<br>kg/h | Energy<br>MW | Carbon<br>kg/h | Energy<br>MW<br>SOEC | Carbon<br>kg/h | Energy<br>MW<br>PEM | Carbon<br>kg/h | Energy<br>MW<br>SOEC | Carbon<br>kg/h | Energy<br>MW<br>PEM |
| <b>Changes to mill BAU</b> |                |              |                |              |                |                      |                |                     |                |                      |                |                     |
| Replacement feed           | 27 268         | 306          | 31 668         | 355          | 25 354         | 284                  | 25 354         | 284                 | 20 796         | 233                  | 20 796         | 233                 |
| Electricity                |                | 6            |                | 2            |                | 126                  |                | 140                 |                | 514                  |                | 569                 |
| <b>Output</b>              |                |              |                |              |                |                      |                |                     |                |                      |                |                     |
| <b>Main</b>                |                |              |                |              |                |                      |                |                     |                |                      |                |                     |
| FTP                        | 7 826          | 120          | 9 057          | 139          | 13 259         | 204                  | 13 259         | 204                 | 24 796         | 381                  | 24 796         | 381                 |
| Electricity                |                | 0            |                | 0            |                | 0                    |                | 0                   |                | 0                    |                | 0                   |
| <b>Secondary</b>           |                |              |                |              |                |                      |                |                     |                |                      |                |                     |
| <b>Steam to mill</b>       |                |              |                |              |                |                      |                |                     |                |                      |                |                     |
| LPS                        |                | 18           |                | 15           |                | 6                    |                | 6                   |                | 0                    |                | 0                   |
| MPS                        |                | 34           |                | 38           |                | 56                   |                | 56                  |                | 90                   |                | 90                  |
| IPS                        |                | 0            |                | -28          |                | 1.6                  |                | 1.6                 |                | 2.2                  |                | 2.2                 |
| District heat              |                | 29           |                | 31           |                | 22                   |                | 22                  |                | 38                   |                | 38                  |
| Green liquor               | 3 201          |              | 3 201          |              | 3 201          |                      | 3 201          |                     | 3 201          |                      | 3 201          |                     |
| Conc. CO2                  | 18 387         |              | 19 146         |              | 14 427         |                      | 14 427         |                     | 14             |                      | 14             |                     |
| Flue gas                   | 3 654          |              | 1 497          |              | 2 024          |                      | 2 024          |                     | 4 944          |                      | 4 944          |                     |
| Cold utility               |                | 72           |                | 82           |                | 94                   |                | 98                  |                | 172                  |                | 185                 |
| Wastewater                 | 600            |              | 767            |              | 759            |                      | 759            |                     | 714            |                      | 714            |                     |
| <b>Other co-product</b>    |                |              |                |              |                |                      |                |                     |                |                      |                |                     |
| Oxygen, kg/h               |                | 0            |                | 0            |                | 0                    |                | 0                   |                | 958                  |                | 958                 |

Table S 19. BLG-FT carbon and energy balance – eSMR configuration

| Scenario            | BLG-FT_6       |              | BLG-FT_7       |              | BLG-FT_8       |                      | BLG-FT_9       |                     | BLG-FT_10      |                      | BLG-FT_11      |                     |
|---------------------|----------------|--------------|----------------|--------------|----------------|----------------------|----------------|---------------------|----------------|----------------------|----------------|---------------------|
|                     | Carbon<br>kg/h | Energy<br>MW | Carbon<br>kg/h | Energy<br>MW | Carbon<br>kg/h | Energy<br>MW<br>SOEC | Carbon<br>kg/h | Energy<br>MW<br>PEM | Carbon<br>kg/h | Energy<br>MW<br>SOEC | Carbon<br>kg/h | Energy<br>MW<br>PEM |
| Changes to mill BAU |                |              |                |              |                |                      |                |                     |                |                      |                |                     |
| Replacement feed    | 27 458         | 308          | 32 851         | 368          | 27 137         | 304                  | 27 137         | 304                 | 28 350         | 318                  | 28 350         | 318                 |
| Electricity         |                | 11           |                | 17           |                | 145                  |                | 158                 |                | 590                  |                | 646                 |
| Output              |                |              |                |              |                |                      |                |                     |                |                      |                |                     |
| Main                |                |              |                |              |                |                      |                |                     |                |                      |                |                     |
| FTP                 | 8 133          | 125          | 9 996          | 154          | 14 588         | 225                  | 14 588         | 225                 | 28 843         | 444                  | 28 843         | 444                 |
| Electricity         |                | 0            |                | 0            |                | 0                    |                | 0                   |                | 0                    |                | 0                   |
| Secondary           |                |              |                |              |                |                      |                |                     |                |                      |                |                     |
| Steam to mill       |                |              |                |              |                |                      |                |                     |                |                      |                |                     |
| LPS                 |                | 16           |                | 11           |                | 2                    |                | 2                   |                | 0                    |                | 0                   |
| MPS                 |                | 35           |                | 42           |                | 60                   |                | 60                  |                | 75                   |                | 75                  |
| IPS                 |                | 0            |                | -36          |                | -9.7                 |                | -9.7                |                | -29.4                |                | -29.4               |
| District heat       |                | 30           |                | 32           |                | 24                   |                | 24                  |                | 42                   |                | 42                  |
| Green liquor        | 3 201          |              | 3 201          |              | 3 201          |                      | 3 201          |                     | 3 201          |                      | 3 201          |                     |
| Conc. CO2           | 18 557         |              | 19 602         |              | 14 974         |                      | 14 974         |                     | 1 418          |                      | 1 418          |                     |
| Flue gas            | 3 198          |              | 0              |              | 0              |                      | 0              |                     | 0              |                      | 0              |                     |
| Cold utility        |                | 73           |                | 89           |                | 103                  |                | 106                 |                | 209                  |                | 222                 |
| Wastewater          | 570            |              | 870            |              | 906            |                      | 906            |                     | 208            |                      | 208            |                     |
| Other co-product    |                |              |                |              |                |                      |                |                     |                |                      |                |                     |
| Oxygen, kg/h        |                | 0            |                | 0            |                | 0                    |                | 0                   |                | 1 024                |                | 1 024               |

#### 4.7 FLUIDIZED BED GASIFICATION FOR SNG PRODUCTION

Table S 20. DFB-SNG marginal carbon and energy balances

| Scenario    | DFB-SNG_ref    |              | DFB-SNG_1      |              | DFB-SNG_2      |              | DFB-SNG_3      |              | DFB-SNG_4      |              | DFB-SNG_5      |              | DFB-SNG_6      |              | DFB-SNG_7      |              |
|-------------|----------------|--------------|----------------|--------------|----------------|--------------|----------------|--------------|----------------|--------------|----------------|--------------|----------------|--------------|----------------|--------------|
|             | Carbon<br>kg/s | Energy<br>MW |
| Biomass     | 3.14           | 115.0        | 3.11           | 113.7        | 2.87           | 105.0        | 2.98           | 109.2        | 2.69           | 98.5         | 2.95           | 107.9        | 2.53           | 92.6         | 2.98           | 109.0        |
| RME         | 0.11           | 5.6          | 0.11           | 5.6          | 0.11           | 5.6          | 0.11           | 5.6          | 0.11           | 5.6          | 0.11           | 5.6          | 0.11           | 5.6          | 0.11           | 5.6          |
| Electricity |                | 9.2          |                | 10.5         |                | 37.6         |                | 33.5         |                | 86.0         |                | 75.0         |                | 174.6        |                | 151.0        |
| SNG         | 1.26           | 90.2         | 1.26           | 90.2         | 1.46           | 105.8        | 1.46           | 105.8        | 1.84           | 132.5        | 1.84           | 132.5        | 2.49           | 181.5        | 2.49           | 181.5        |
| DH          |                | 5.0          |                | 5.0          |                | 0.7          |                | 1.0          |                | 6.1          |                | 5.0          |                | 17.7         |                | 11.8         |

Table S 21. O2FB-SNG carbon and energy balances

| Scenario    | O <sub>2</sub> FB-SNG_ref |              | O <sub>2</sub> FB-SNG_1 |              | O <sub>2</sub> FB-SNG_2 |              | O <sub>2</sub> FB-SNG_3 |              | O <sub>2</sub> FB-SNG_4 |              | O <sub>2</sub> FB-SNG_5 |              | O <sub>2</sub> FB-SNG_6 |              |
|-------------|---------------------------|--------------|-------------------------|--------------|-------------------------|--------------|-------------------------|--------------|-------------------------|--------------|-------------------------|--------------|-------------------------|--------------|
|             | Carbon<br>kg/s            | Energy<br>MW | Carbon<br>kg/s          | Energy<br>MW | Carbon<br>kg/s          | Energy<br>MW | Carbon<br>kg/s          | Energy<br>MW | Carbon<br>kg/s          | Energy<br>MW | Carbon<br>kg/s          | Energy<br>MW | Carbon<br>kg/s          | Energy<br>MW |
| Biomass     | 6.69                      | 270.0        | 6.69                    | 270.0        | 6.69                    | 270.0        | 6.69                    | 270.0        | 6.69                    | 270.0        | 6.69                    | 270.0        | 6.69                    | 270.0        |
| Electricity |                           | -0.96        |                         | 23.05        |                         | 19.31        |                         | 287.99       |                         | 248.28       |                         | 391.30       |                         | 338.98       |
| SNG         | 2.19                      | 160.1        | 2.40                    | 174.5        | 2.40                    | 174.5        | 4.56                    | 329.32       | 4.56                    | 329.32       | 5.35                    | 387.3        | 5.35                    | 387.3        |
| DH          |                           | 68.24        |                         | 71.19        |                         | 67.91        |                         | 117.47       |                         | 83.18        |                         | 133.96       |                         | 88.92        |

#### 4.8 FLUIDIZED BED GASIFICATION FOR FT FUELS PRODUCTION

Table S 22. DFB-FT marginal carbon and energy balances

| Scenario    | DFB-FT_ref |        | DFB-FT_1 |        | DFB-FT_2 |        | DFB-FT_3 |        | DFB-FT_4 |        | DFB-FT_5 |        |
|-------------|------------|--------|----------|--------|----------|--------|----------|--------|----------|--------|----------|--------|
|             | Carbon     | Energy | Carbon   | Energy | Carbon   | Energy | Carbon   | Energy | Carbon   | Energy | Carbon   | Energy |
|             | kg/s       | MW     | kg/s     | MW     | kg/s     | MW     | kg/s     | MW     | kg/s     | MW     | kg/s     | MW     |
| Biomass     | 2.70       | 99.0   | 2.76     | 101.1  | 2.85     | 104.4  | 2.85     | 104.4  | 2.85     | 104.2  | 2.85     | 104.2  |
| RME         | 0.11       | 5.6    | 0.11     | 5.6    | 0.11     | 5.6    | 0.11     | 5.6    | 0.11     | 5.6    | 0.11     | 5.6    |
| Electricity |            | 13.53  |          | 48.58  |          | 135.40 |          | 123.82 |          | 147.75 |          | 134.68 |
| FTP         | 1.07       | 58.96  | 1.54     | 84.69  | 2.30     | 126.90 | 2.30     | 126.90 | 2.41     | 132.57 | 2.41     | 132.57 |
| DH          |            | 16.88  |          | 25.82  |          | 53.27  |          | 43.13  |          | 56.66  |          | 45.20  |

Table S 23. O2FB-FT carbon and energy balances

| Scenario           | O2FB-FT_ref |        | O2FB-FT_1 |        | O2FB-FT_2 |        | O2FB-FT_3 |        |
|--------------------|-------------|--------|-----------|--------|-----------|--------|-----------|--------|
|                    | Carbon      | Energy | Carbon    | Energy | Carbon    | Energy | Carbon    | Energy |
|                    | kg/s        | MW     | kg/s      | MW     | kg/s      | MW     | kg/s      | MW     |
| Biomass (marginal) | 6.69        | 270.0  | 6.69      | 270.0  | 6.69      | 270.0  | 6.69      | 270.0  |
| Electricity        |             | -6.89  |           | 59.55  |           | 343.13 |           | 305.4  |
| FTP                | 1.90        | 104.77 | 2.77      | 152.59 | 5.28      | 286.70 | 5.28      | 286.70 |
| DH                 |             | 100.72 |           | 113.09 |           | 197.39 |           | 164.34 |

## REFERENCES

- [1] Fuel Cell Technology - elcogen 2022. <https://elcogen.com/> (accessed August 22, 2022).
- [2] HIAT-Hydrogen and Informatics Institute of Applied Technologies 2022. <https://www.hiat.de/> (accessed August 22, 2022).
- [3] Klop E. Steaming ahead with MVR. Co-Generation On-Site Power Prod 2015;1–4. <https://blueterra.nl/wp-content/uploads/2018/03/Steaming-ahead-with-MVR-COSPP.pdf> (accessed August 22, 2022).
- [4] Alamia A, Larsson A, Breitholtz C, Thunman H. Performance of large-scale biomass gasifiers in a biorefinery, a state-of-the-art reference. *Int J Energy Res* 2017;41:2001–19. <https://doi.org/10.1002/er.3758>.
- [5] Liang Z (Henry), Rongwong W, Liu H, Fu K, Gao H, Cao F, et al. Recent progress and new developments in post-combustion carbon-capture technology with amine based solvents. *Int J Greenh Gas Control* 2015;40:26–54. <https://doi.org/10.1016/j.ijggc.2015.06.017>.
- [6] Xie N, Chen B, Tan C, Liu Z. Energy Consumption and Exergy Analysis of MEA-Based and Hydrate-Based CO<sub>2</sub> Separation. *Ind Eng Chem Res* 2017;56:15094–101. <https://doi.org/10.1021/acs.iecr.7b03729>.
- [7] Stora källor för biogen CO<sub>2</sub> lista 2019. <https://bioenergitidningen.se/app/uploads/sites/2/2019/04/Stora-kallor-för-biogen-CO2-lista.pdf> (accessed February 21, 2022).
- [8] Brynolf S, Taljegard M, Grahn M, Hansson J. Electrofuels for the transport sector : A review of production costs. *Renew Sustain Energy Rev* 2018;81:1887–905. <https://doi.org/10.1016/j.rser.2017.05.288>.
- [9] Thunman H, Gustavsson C, Larsson A, Gunnarsson I, Tengberg F. Economic assessment of advanced biofuel production via gasification using cost data from the GoBiGas plant. *Energy Sci Eng* 2019;7:217–29. <https://doi.org/10.1002/ese3.271>.
- [10] Tews IJ, Zhu Y, Drennan C, Elliott DC, Snowden-Swan LJ, Onarheim K, et al. Biomass Direct Liquefaction Options. TechnoEconomic and Life Cycle Assessment. Richland, WA (United States): 2014. <https://doi.org/10.2172/1184983>.
- [11] Baltrusaitis J, Luyben WL. Methane Conversion to Syngas for Gas-to-Liquids (GTL): Is Sustainable CO<sub>2</sub> Reuse via Dry Methane Reforming (DMR) Cost Competitive with SMR and ATR Processes? *ACS Sustain Chem Eng* 2015;3:2100–11. <https://doi.org/10.1021/acssuschemeng.5b00368>.
- [12] Arvidsson M, Morandin M, Harvey S. Biomass Gasification-Based Syngas Production for a Conventional Oxo Synthesis Plant—Process Modeling, Integration Opportunities, and Thermodynamic Performance. *Energy & Fuels* 2014;28:4075–87. <https://doi.org/10.1021/ef500366p>.
- [13] Glenk G, Reichelstein S. Economics of converting renewable power to hydrogen. *Nat*

Energy 2019;4:216–22. <https://doi.org/10.1038/s41560-019-0326-1>.

- [14] Marsidi M. Industrial Mechanical Vapour Recompression (MVR). 2019.
- [15] Liu G, Larson ED, Williams RH, Kreutz TG, Guo X. Making Fischer-Tropsch fuels and electricity from coal and biomass: Performance and cost analysis. *Energy and Fuels* 2011;25:415–37. <https://doi.org/10.1021/ef101184e>.
- [16] Wismann ST, Engbæk JS, Vendelbo SB, Bendixen FB, Eriksen WL, Aasberg-Petersen K, et al. Electrified methane reforming: A compact approach to greener industrial hydrogen production. *Science (80- )* 2019;364:756–9. <https://doi.org/10.1126/science.aaw8775>.
